# Supplementary material for: Synthesis of nonanuclear heterometallic carbide clusters. Unexpected formation of the [Ru6(CO)16]2−[Pt2(CO)2(dppm)2]2+ion pair on the way to [Ru6C(CO)16Pt3(dppm)2]
Source: Royal Society of Chemistry journal article supplement (doi:10.1039/b609253e), 2006-01-01
Supplement: b609253e.pdf [file b609253e.pdf]

**Supporting Information for:**

**Synthesis of nonanuclear heterometallic carbide clusters. Unexpected formation of  $[\text{Ru}_6(\text{CO})_{16}]^{2+}[\text{Pt}_2(\text{CO})_2(\text{dppm})_2]^{2-}$  ion pair on the way to  $[\text{Ru}_6\text{C}(\text{CO})_{16}\text{Pt}_3(\text{dppm})_2]$ .**

Igor O. Koshevoy<sup>a, b</sup>, Matti Haukka<sup>b</sup>, Tapani A. Pakkanen<sup>b\*</sup> and Sergey P. Tunik<sup>a\*</sup>

<sup>a</sup> *Department of Chemistry, St. Petersburg State University, Universitetskii pr., 26, St. Petersburg 198504, Russian Federation*

<sup>b</sup> *Department of Chemistry, University of Joensuu, P.O. Box 111, FIN-80101 Joensuu, Finland*

**Figure S1.** 101 MHz  $^{31}\text{P}\{^1\text{H}\}$  spectrum of **1** (acetone- $\text{d}_6$ , 293 K).

**Figure S2.** The diagram of spin-spin couplings in **2**, coupling constants and relaxation parameters of the isotopomers.

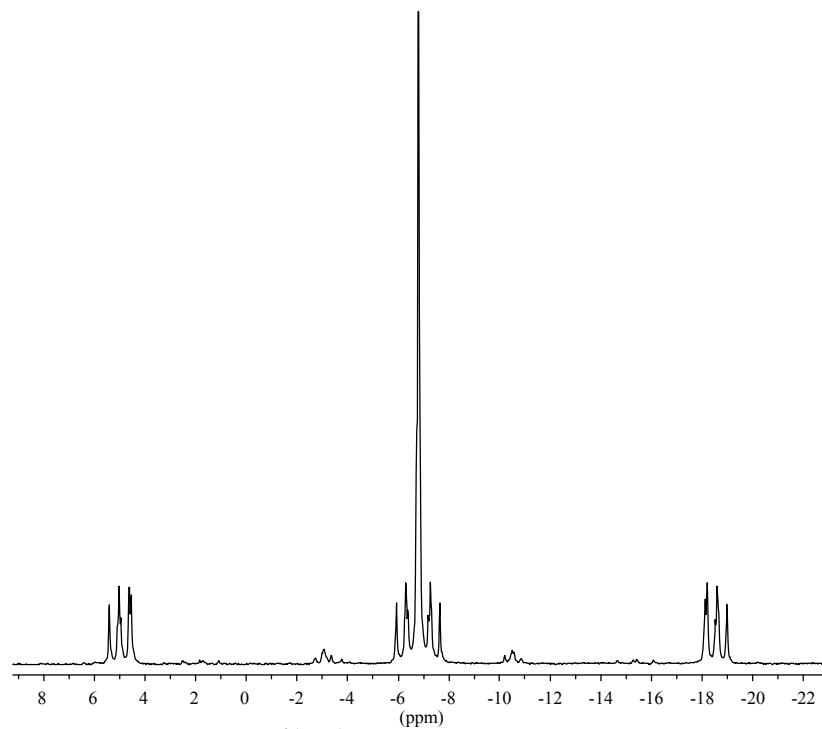

**Figure S1.** 101 MHz  $^{31}\text{P}\{^1\text{H}\}$  spectrum of **1** (acetone- $\text{d}_6$ , 293 K).

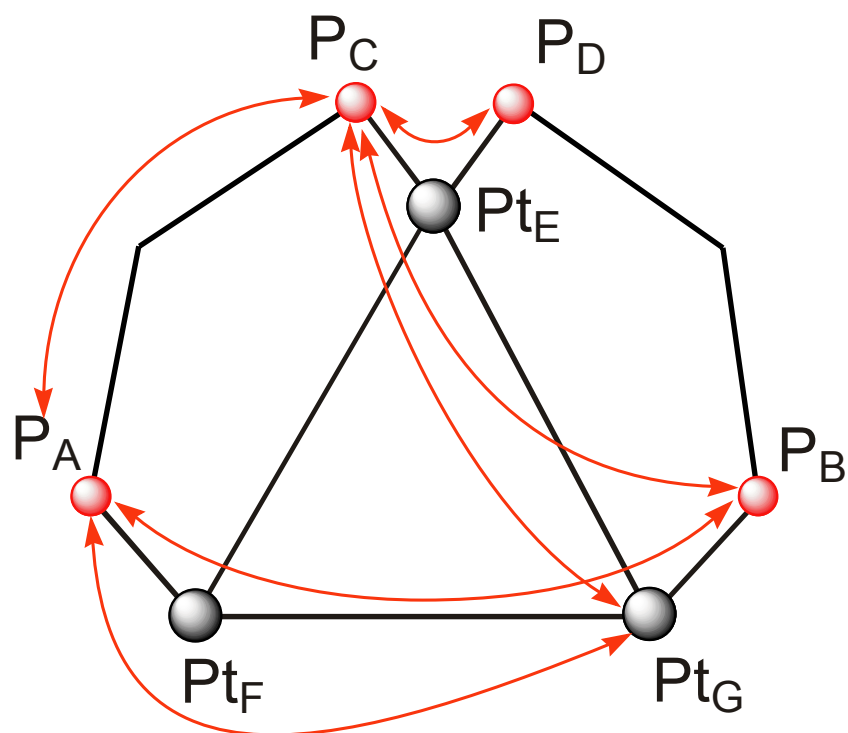

**Figure S2.** The diagram of spin-spin couplings in **2**.

Coupling constants ( $J$ , Hz) and relaxation parameters ( $t$ ,  $s$ ) of the isotopomers.

1. Isotopomer  $(dppm)_2$ , no magnetic  $^{195}\text{Pt}$ .

$\delta(\text{P}_A)$  13.0  $t=0.15$

$\delta(\text{P}_B)$  13.0  $t=0.15$

$\delta(\text{P}_C)$  -30.0  $t=0.25$

$\delta(\text{P}_D)$  -30.0  $t=0.25$

$J(\text{P}_A - \text{P}_B)$  100.0

$J(\text{P}_A - \text{P}_C)$  34.5

$J(\text{P}_A - \text{P}_D)$  21.5

$J(\text{P}_B - \text{P}_C)$  21.5

$J(\text{P}_B - \text{P}_D)$  34.5

$J(\text{P}_C - \text{P}_D)$  18.5

\*\*\*\*\*

2. Isotopomer  $^{195}\text{Pt}(\text{P}_C\text{P}_D)(dppm)_2$ .

$\delta$  (P<sub>A</sub>) 13.0 t=0.1  
 $\delta$  (P<sub>B</sub>) 13.0 t=0.1

$\delta$  (P<sub>C</sub>) -30.0 t=0.1  
 $\delta$  (P<sub>D</sub>) -30.0 t=0.1

J(P<sub>A</sub> - P<sub>B</sub>) 100.0  
J(P<sub>A</sub> - P<sub>C</sub>) 34.5  
J(P<sub>A</sub> - P<sub>D</sub>) 21.5  
J(P<sub>A</sub> - Pt<sub>E</sub>) 42

J(P<sub>B</sub> - P<sub>C</sub>) 21.5  
J(P<sub>B</sub> - P<sub>D</sub>) 34.5  
J(P<sub>B</sub> - Pt<sub>E</sub>) 42

J(P<sub>C</sub> - P<sub>D</sub>) 18.5  
J(P<sub>C</sub> - Pt<sub>E</sub>) 3415

J(P<sub>D</sub> - Pt<sub>E</sub>) 3415

\*\*\*\*\*

3. Isotopomer <sup>195</sup>Pt(P<sub>A</sub> or P<sub>B</sub>)(dppm)<sub>2</sub>.

$\delta$  (P<sub>A</sub>) 13.0 t=0.01  
 $\delta$  (P<sub>B</sub>) 13.0 t=0.01

$\delta$  (P<sub>C</sub>) -30.0 t=0.15  
 $\delta$  (P<sub>D</sub>) -30.0 t=0.01

J(P<sub>A</sub> - P<sub>B</sub>) 100.0  
J(P<sub>A</sub> - P<sub>C</sub>) 34.5  
J(P<sub>A</sub> - P<sub>D</sub>) 21.5  
J(P<sub>A</sub> - Pt<sub>F</sub>) 4478

J(P<sub>B</sub> - P<sub>C</sub>) 21.5  
J(P<sub>B</sub> - P<sub>D</sub>) 34.5

J(P<sub>C</sub> - P<sub>D</sub>) 18.5

J(P<sub>D</sub> - Pt<sub>F</sub>) 616

\*\*\*\*\*

4. Isotopomer <sup>195</sup>Pt(P<sub>A</sub> and P<sub>B</sub>)(dppm)<sub>2</sub>.

$\delta$  (P<sub>A</sub>) 13.0 t=0.01

$\delta$  (P<sub>B</sub>) 13.0 t=0.01

$\delta$  (P<sub>C</sub>) -30.0 t=0.01

$\delta$  (P<sub>D</sub>) -30.0 t=0.01

J(P<sub>A</sub> - P<sub>B</sub>) 100.0

J(P<sub>A</sub> - P<sub>C</sub>) 34.5

J(P<sub>A</sub> - P<sub>D</sub>) 21.5

J(P<sub>A</sub> - Pt<sub>F</sub>) 4478

J(P<sub>B</sub> - P<sub>C</sub>) 21.5

J(P<sub>B</sub> - P<sub>D</sub>) 34.5

J(P<sub>B</sub> - Pt<sub>G</sub>) 4478

J(P<sub>C</sub> - P<sub>D</sub>) 18.5

J(P<sub>C</sub> - Pt<sub>G</sub>) 616

J(P<sub>D</sub> - Pt<sub>F</sub>) 616

\*\*\*\*\*

5. Isotopomer <sup>195</sup>Pt(P<sub>A</sub> and P<sub>C</sub>P<sub>D</sub>)(dppm)<sub>2</sub>.

$\delta$  (P<sub>A</sub>) 13.0 t=0.01

$\delta$  (P<sub>B</sub>) 13.0 t=0.01

$\delta$  (P<sub>C</sub>) -30.0 t=0.01

$\delta$  (P<sub>D</sub>) -30.0 t=0.01

J(P<sub>A</sub> - P<sub>B</sub>) 100.0

J(P<sub>A</sub> - P<sub>C</sub>) 34.5

J(P<sub>A</sub> - P<sub>D</sub>) 21.5

J(P<sub>A</sub> - Pt<sub>F</sub>) 4478

J(P<sub>A</sub> - Pt<sub>E</sub>) 42

J(P<sub>B</sub> - P<sub>C</sub>) 21.5

J(P<sub>B</sub> - P<sub>D</sub>) 34.5

J(P<sub>B</sub> - Pt<sub>E</sub>) 42

J(P<sub>C</sub> - P<sub>D</sub>) 18.5

J(P<sub>C</sub> - Pt<sub>E</sub>) 3415

J(P<sub>D</sub> - Pt<sub>E</sub>) 3415

J(P<sub>D</sub> - Pt<sub>F</sub>) 616

\*\*\*\*\*

6. Isotopomer <sup>195</sup>Pt(P<sub>A</sub>P<sub>B</sub>P<sub>C</sub>P<sub>D</sub>)(dppm)<sub>2</sub>.

$\delta$  (P<sub>A</sub>) 13.0 t=0.01  
 $\delta$  (P<sub>B</sub>) 13.0 t=0.01

$\delta$  (P<sub>C</sub>) -30.0 t=0.01  
 $\delta$  (P<sub>D</sub>) -30.0 t=0.01

J(P<sub>A</sub> - P<sub>B</sub>) 100.0  
J(P<sub>A</sub> - P<sub>C</sub>) 34.5  
J(P<sub>A</sub> - P<sub>D</sub>) 21.5  
J(P<sub>A</sub> - Pt<sub>F</sub>) 4478  
J(P<sub>A</sub> - Pt<sub>E</sub>) 42

J(P<sub>B</sub> - P<sub>C</sub>) 21.5  
J(P<sub>B</sub> - P<sub>D</sub>) 34.5  
J(P<sub>B</sub> - Pt<sub>E</sub>) 42  
J(P<sub>B</sub> - Pt<sub>G</sub>) 4478

J(P<sub>C</sub> - P<sub>D</sub>) 18.5  
J(P<sub>C</sub> - Pt<sub>E</sub>) 3415  
J(P<sub>C</sub> - Pt<sub>G</sub>) 616

J(P<sub>D</sub> - Pt<sub>E</sub>) 3415  
J(P<sub>D</sub> - Pt<sub>F</sub>) 616  
J(P<sub>D</sub> - Pt<sub>G</sub>) 18.5
